# Kilohertz two-photon fluorescence microscopy imaging of neural activity *in vivo*

Jianglai Wu<sup>1, 2, 3</sup>, Yajie Liang<sup>3</sup>, Shuo Chen<sup>1</sup>, Ching-Lung Hsu<sup>3</sup>, Mariya Chavarha<sup>4</sup>, Stephen W Evans<sup>4</sup>, Donqging Shi<sup>4</sup>, Michael Z Lin<sup>4</sup>, Kevin K Tsia<sup>2, \*</sup>, and Na Ji<sup>1, 3, 5\*</sup>

<sup>1</sup>Department of Physics, Department of Molecular and Cell Biology, Helen Wills Neuroscience Institute, University of California, Berkeley, CA, USA

<sup>2</sup>Department of Electrical and Electronic Engineering, The University of Hong Kong, Pokfulam Road, Hong Kong, China

<sup>3</sup>Janelia Research Campus, Howard Hughes Medical Institute, Ashburn, VA, USA

<sup>4</sup>Department of Bioengineering, Stanford University, Stanford, California, USA

<sup>5</sup>Molecular Biophysics and Integrated Bioimaging Division, Lawrence Berkeley National Laboratory, Berkeley, CA, USA

\*To whom correspondence should be addressed: [tsia@hku.hk](mailto:tsia@hku.hk), [jina@berkeley.edu](mailto:jina@berkeley.edu)

**Understanding information processing in the brain requires us to monitor neural activity *in vivo* at high spatiotemporal resolution. Using an ultrafast two-photon fluorescence microscope (2PFM) empowered by all-optical laser scanning, we imaged neural activity *in vivo* at up to 3,000 frames per second and submicron spatial resolution. This ultrafast imaging method enabled monitoring of both supra- and sub-threshold electrical activity down to 345  $\mu\text{m}$  below the brain surface in head fixed awake mice.**

The ability to monitor neural signaling at synaptic and cellular resolution *in vivo* holds the key to dissecting the complex mechanisms of neural activity in intact brains of behaving animals. The past decade has witnessed a proliferation of genetically encoded fluorescence indicators that monitor diverse neural signaling events *in vivo*, including those sensing calcium transients, neurotransmitter and neuromodulator release, and membrane voltage [1]. Most popular are the calcium indicators (e.g., GCaMP6 [2]) and glutamate sensors (e.g., iGluSnFR [3]), with their success partly attributable to their slow temporal dynamics (e.g., rise and decay times of 100 – 1000's milliseconds for GCaMP6 and tens of milliseconds for iGluSnFR), which can be adequately sampled with conventional 2PFM systems. Indeed, using point scanning and near-infrared wavelength for fluorescence excitation, 2PFM can routinely image calcium activity hundreds of microns deep in opaque brains with submicron spatial resolution [4-6].

31 Imaging faster events, however, is more challenging. Indicators reporting membrane  
32 voltage, arguably the most direct and important measure of neural activity, have rise and decay  
33 times measured in milliseconds. Too fast for the frame rate of conventional 2PFM to match, their  
34 *in vivo* imaging demonstrations were mostly carried out by widefield fluorescence microscopy with  
35 comparatively poor spatial resolution and limited to superficial depths of the brain [7-9]. In other  
36 words, the capability of state-of-the-art indicators has outstripped our ability to image them at  
37 sufficiently high speed, especially at high spatial resolution and through highly scattering brain  
38 tissue.

39 To observe millisecond dynamics such as membrane potential variations, we need to  
40 increase 2PFM frame rates to the kHz range. The sampling rate of conventional raster-scanning  
41 2PFM is limited by the speed of laser scanners, such as galvanometric mirrors, to tens of frames  
42 per second (fps) [5, 6]. Random-access 2PFM using acoustic-optical deflectors allows kHz frame  
43 rates and has been used to monitor the membrane potential of neurons expressing genetically  
44 encoded voltage indicators (GEVIs) in brain slices and *in vivo* [10, 11], but can only track a pre-  
45 selected set of locations (currently up to ~20). A line-projection tomographical 2PFM system was  
46 used to detect glutamate release in the brain at kHz frame rates [12], but is limited in the  
47 complexity of fluorophore distributions that can be reconstructed for a given number of excitation  
48 angles. Notably, in these 2PFM implementations, the pixel dwell times (0.1 – 40 microseconds)  
49 are much longer than the theoretical minimum dwell time required for assigning signals to  
50 scanned locations. This minimum dwell time is on the order of several nanoseconds, limited only  
51 by the fact that dwell times shorter than fluorophore excited state lifetimes would allow emission  
52 photons to return from multiple excited locations at the same time [13]. Here, by leveraging an all-  
53 optical passive laser scanner based on a concept termed free-space angular-chirp-enhanced  
54 delay (FACED) [14], we demonstrated raster-scanning 2PFM at 1,000 fps and 3,000 fps, with the  
55 pixel dwell time flexibly configured to reach the fluorescence lifetime limit. We applied it to ultrafast  
56 monitoring of calcium activity, glutamate release, and membrane potential with a variety of  
57 genetically encoded activity indicators, and demonstrated ultrafast 2PFM imaging of spontaneous  
58 and sensory-evoked supra- and sub-threshold electrical activity in awake mouse brains *in vivo*.

59 The principle of FACED was detailed previously (**Fig. 1a**) [14]. Briefly, a pulsed laser  
60 beam was focused in 1D by a cylindrical lens and obtained a converging angle  $\Delta\theta$ . It was then  
61 launched into a pair of almost parallel high-reflectivity mirrors with separation  $S$  and misalignment  
62 angle  $\alpha$ . After multiple reflections by the mirrors, the laser beam/pulse was split into multiple  
63 beamlets/subpulses ( $N = \Delta\theta/\alpha$ ) of distinct propagation directions and eventually retroreflected with

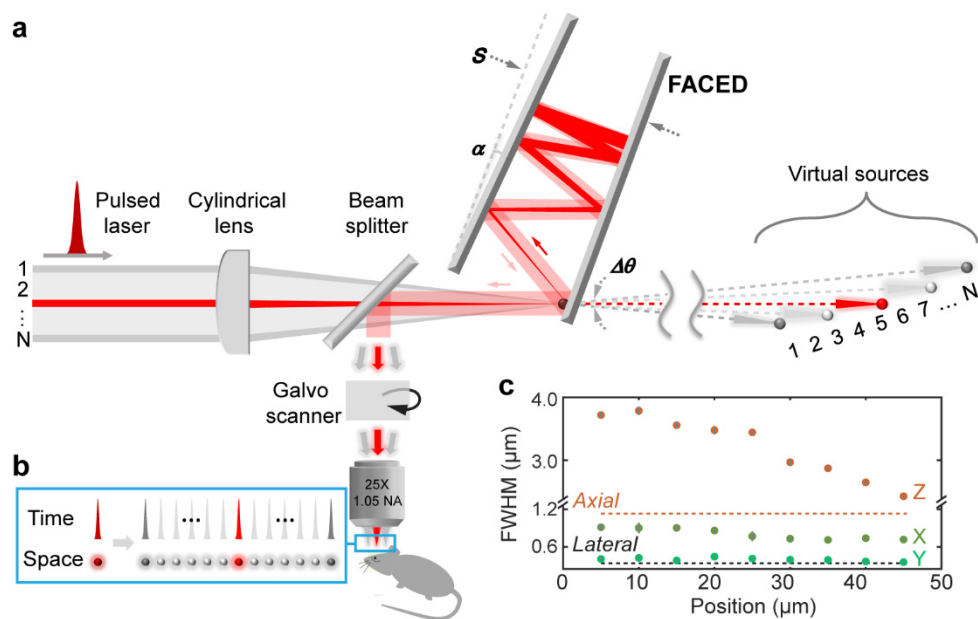

**Figure 1: Principles and resolution of a 2PFM with a FACED module.** (a) Schematic of a FACED microscope. A 1-MHz collimated femtosecond laser was focused into a nearly parallel mirror pair with a converging angle  $\Delta\theta$  by a cylindrical lens. After multiple reflections, the misalignment angle  $\alpha$  caused the beamlets to retroreflect (e.g., the red rays). Beamlets at different incidence angles (e.g., red versus gray rays) emerged with distinct propagation directions and temporal delays. Equivalently, the sequence of multiple beamlets ( $N = \Delta\theta/\alpha$ ) at the output of the FACED module can be treated as light emanating from an array of virtual sources. These beamlets were then coupled into a 2PFM and formed (b) an array of spatially separated and temporally delayed foci at the focal plane of a microscope objective. (c) The focal spot sizes along the X/FACED, Y, and Z axes, measured from 200-nm-diameter fluorescent beads. Error bars show s.d. from 10 beads; dashed lines indicate the expected axial and lateral resolutions at 1.05 NA.

64 an inter-pulse temporal delay of  $2S/c$ , with  $c$  being the speed of light. After being relayed to enter  
 65 a microscope objective, this pulse train formed an array of spatially separated and temporally  
 66 delayed foci (**Fig. 1b**). In a fluorescent sample, they excited two-photon fluorescence in  
 67 succession, which could be detected by a photomultiplier tube, sampled at high speed, and  
 68 assigned to individual foci and image pixels. Effectively, this passive FACED module allows line  
 69 scanning at the repetition rate of the pulsed laser, typically MHz.

70 In this work, we designed a FACED module and incorporated it into a standard 2PFM  
 71 upgraded with a high-speed data acquisition system (625 MS/s) (**Supplementary Methods,**  
 72 **Supplementary Fig. 1**). Using a 920-nm laser with a 1-MHz repetition rate, our FACED module  
 73 produced a line of 80 pulsed foci spanning 50  $\mu\text{m}$  each microsecond. The inter-pulse interval was  
 74 set at 2 ns to reduce pixel crosstalk due to fluorescence lifetime and detector response time. We  
 75 measured the full width at half maxima (FWHMs) of these foci by imaging 200-nm-diameter  
 76 fluorescent beads. From the first to last, the foci were images of virtual sources formed after

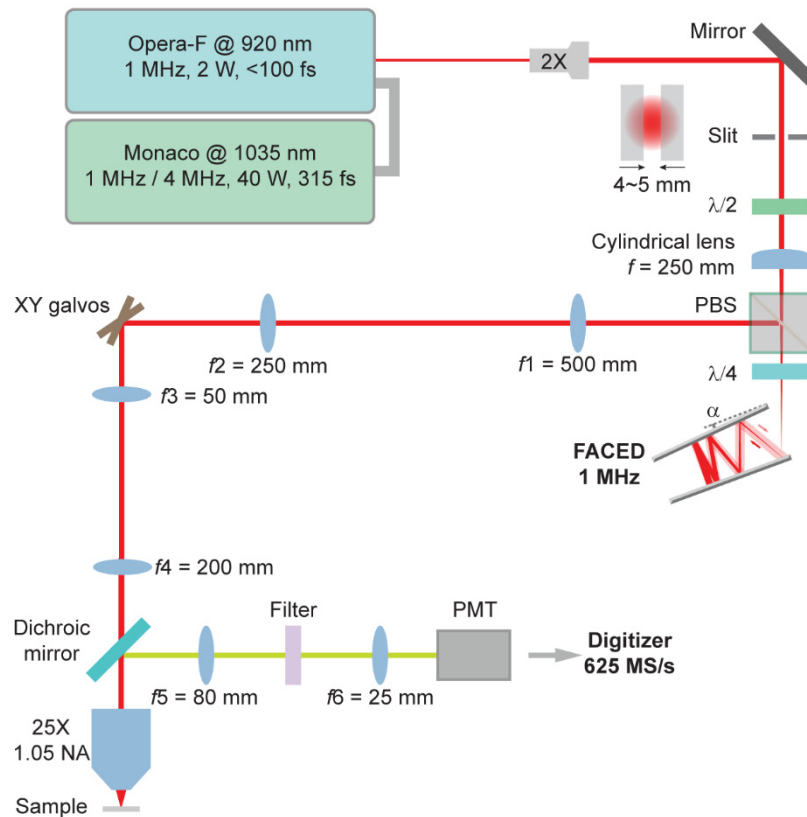

**Supplementary Figure 1:**  
**Optical layout of the FACED two-photon fluorescence microscope.** 2X: 2-fold beam expander;  $\lambda/2$ : Half-wave plate; PBS: polarizing beam splitter;  $\lambda/4$ : quarter-wave plate;  $\alpha$ : misalignment angle of the mirror pair; PMT: photomultiplier tube. The FACED module scans the foci along the X galvo direction. Note that the X galvo is deactivated for high-speed functional imaging.

77 distinct numbers of mirror reflections and located at increasing distances away (**Fig. 1a**), with the  
78 more distant virtual sources leading to larger beam sizes at the back focal plane of the objective.  
79 As a result, the more temporally delayed pulses had smaller foci along both the lateral and axial  
80 directions (**Fig. 1c**). The beams filled the back focal plane more along the Y than X/FACED axis,  
81 resulting in  $\sim 0.82 \mu\text{m}$  (X) and  $\sim 0.35 \mu\text{m}$  (Y) lateral resolution, sufficient to resolve subcellular  
82 structures. With the FACED module providing an 80-pixel line each microsecond, we scanned an  
83 entire frame of  $80 \times 900$  pixels at 1,000 Hz by scanning the Y galvanometer at 500 Hz and  
84 collecting data bidirectionally. An additional X galvanometer allowed us to tile the images to cover  
85 a larger field of view, if desired.

86 We first used the FACED 2PFM to image calcium dynamics using genetically encoded  
87 calcium indicators GCaMP6s and 6f [2]. At 1 kHz, morphological features were clearly resolved  
88 in individual images (see **Supplementary Fig. 2** for representative raw images taken at 1 kHz).  
89 We reliably detected calcium transients in GCaMP6s-expressing cultured neurons  
90 (**Supplementary Fig. 3** and **Video 1**) and GCaMP6f-expressing acute mouse brain slices  
91 (**Supplementary Fig. 4** and **Video 2**) that were evoked by extracellular electric stimulation. Due  
92 to its high spatiotemporal resolution, we could clearly resolve neurites in cultured neurons, and in

93 one case, we recorded spontaneous calcium releases in neurites which then propagated at 25  
94  $\mu\text{m/s}$  across the dendrites (**Supplementary Fig. 5 and video 3**).

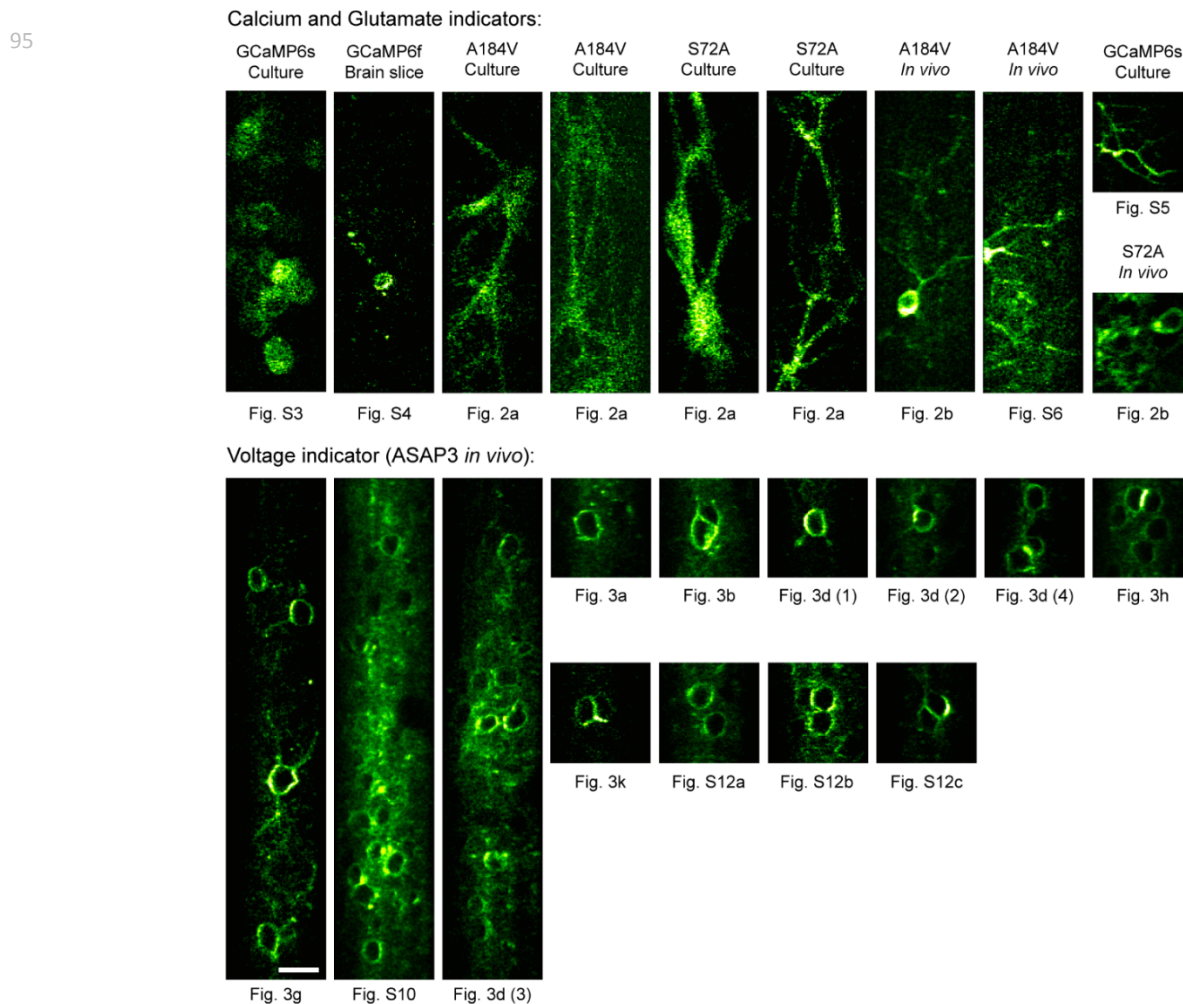

**Supplementary Figure 2: Representative raw images taken at 1,000 fps for different indicators.** Calcium indicators: GCaMP6s/6f; Glutamate indicators: A184V and S72A variants of SF-iGluSnFR; voltage indicator: ASAP3-Kv. Scale bar: 20  $\mu\text{m}$ .

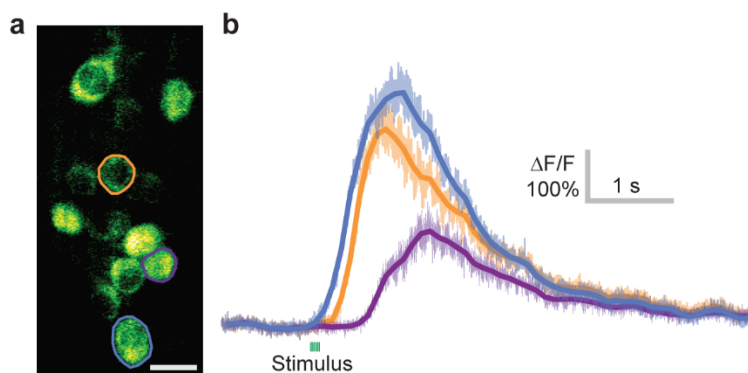

**Supplementary Figure 3: 1 kHz imaging of GCaMP6s-expressing cultured neurons.**

(a) Morphological image. (b) Calcium transients of 3 cells in (a) evoked by field electrode stimulation and recorded at 1,000 fps. Darker lines were 100-point boxcar averages of the raw traces to guide the eye. Scale bar: 20  $\mu\text{m}$ .

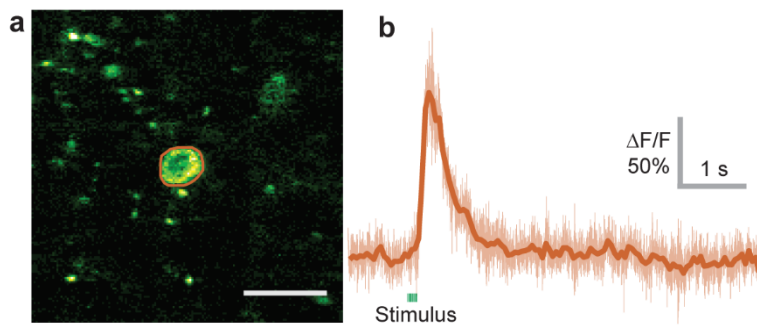

**Supplementary Figure 4: 1 kHz imaging of a GCaMP6f-expressing neuron in an acute brain slice.** (a) Morphological image. (b) Calcium transient of the cell in (a) evoked by field electrode stimulation and recorded at 1,000 fps. Darker line was 50-point boxcar average of the raw trace to guide the eye. Scale bar: 20  $\mu\text{m}$ .

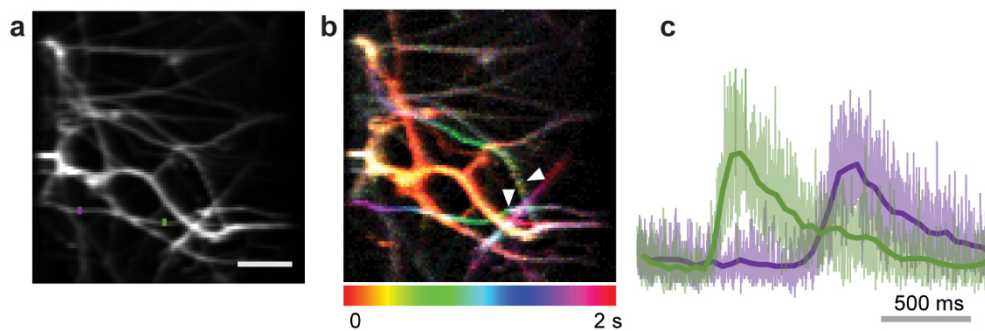

**Supplementary Figure 5: 1 kHz imaging of spontaneous calcium increases in neurites of GCaMP6s-expressing cultured neurons.** (a) Mean intensity projection of 2,000 frames. (b) Temporal color coding of the 2,000 frames highlights the sites where calcium increases were initially observed (white arrowheads). (c) Calcium transients at the color masked positions in (a), indicating a calcium propagating speed of  $\sim 25 \mu\text{m/s}$ . Darker lines were 50-point boxcar averages of the raw traces to guide the eye. Scale bar: 10  $\mu\text{m}$ .

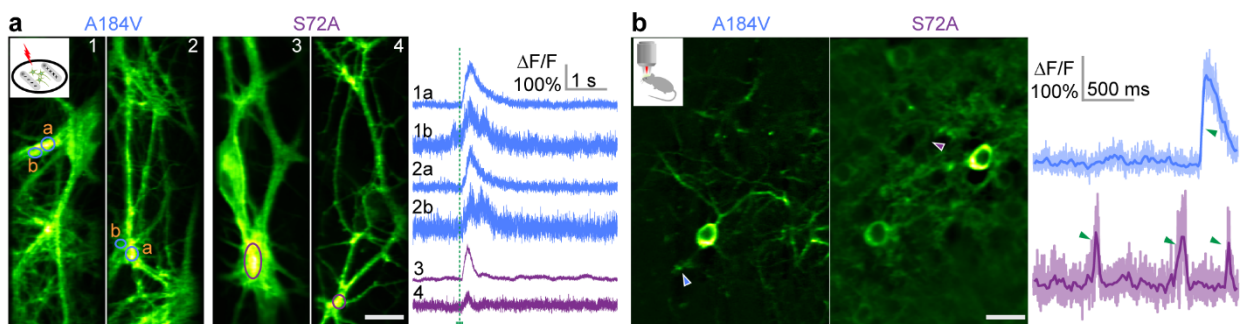

**Figure 2: 1 kHz imaging of genetically encoded glutamate indicator iGluSnFR variants in cultured neurons and in V1 of awake mice *in vivo*.** (a) (Left) mean intensity projections of cultured neurons expressing either the A184V or the S72A variants of SF-iGluSnFR; (Right) transients associated with glutamate release triggered by extracellular electric stimulation (green dashed line) for structures labeled on the left. (b) (Left) Representative images of layer 2/3 neurons (depth: 150 – 250  $\mu\text{m}$ ) expressing either A184V or S72A in V1 of awake mice; (Right) Transients associated with spontaneous glutamate releases at sites indicated by arrowheads on the left. Here, darker lines were 20-point boxcar averages of the raw traces to guide the eye. Green arrowheads on the traces highlight the fast rising edge of the glutamate transients. Scale bars: 20  $\mu\text{m}$ . “Green hot” lookup table in ImageJ was applied to all images. Post-objective power: 25 – 30 mW for cultured neurons, 40 mW *in vivo*.

97 Clearly, the true power of FACED lies in imaging faster physiological events. Next, we  
98 imaged neurons labeled with the A184V (medium-affinity) and S72A (low-affinity) variants of the  
99 genetically encoded glutamate sensor SF-iGluSnFR, which are expressed on cell membranes  
100 and report spikes with faster activation and inactivation kinetics than the calcium indicators [15].  
101 FACED 2PFM reliably reported glutamate release events evoked by field stimulation in cultured  
102 neurons (**Fig. 2a** and **Supplementary videos 4-7**), as well as spontaneous glutamate release in  
103 L2/3 neurons in the primary visual cortex (V1) of head-fixed awake mice (**Fig. 2b** and  
104 **Supplementary videos 8-9**). Both in culture and *in vivo*, we observed faster dynamics from the  
105 lower-affinity variant S72A than A184V, consistent with their previous characterization by  
106 conventional 2PFM [15]. Imaging the brain *in vivo* at 1,000 fps, we also observed rapid  
107 movements of fluorescent particles, which transited the field of view at  $\sim 1$  mm/s (**Supplementary**  
108 **Fig. 6** and **Supplementary video 10**). We speculated that they were macrophages containing  
109 fluorescent remnants of dead cells, moving rapidly with blood flow in the vasculature. The ability  
110 of FACED 2PFM to capture such rapid events indicates that this method can also be used to  
111 study rapid biological events associated with blood flow.

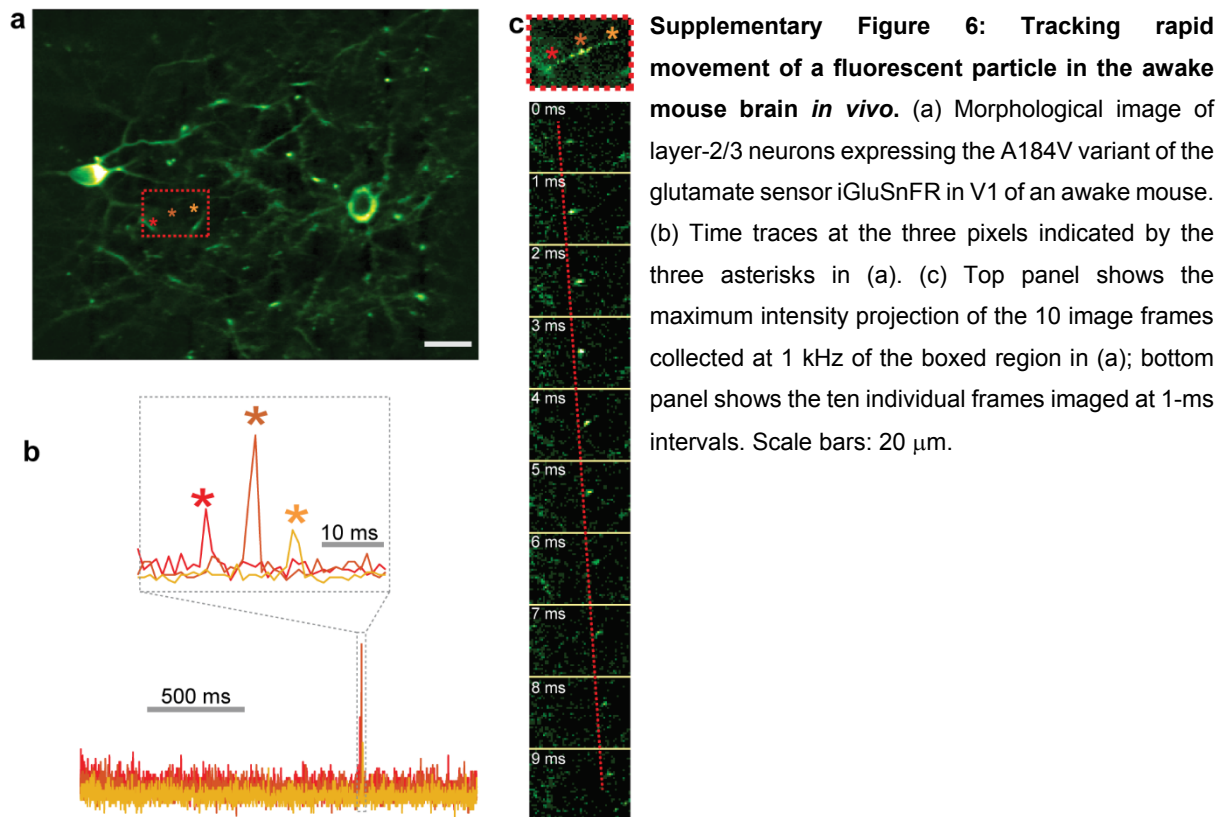

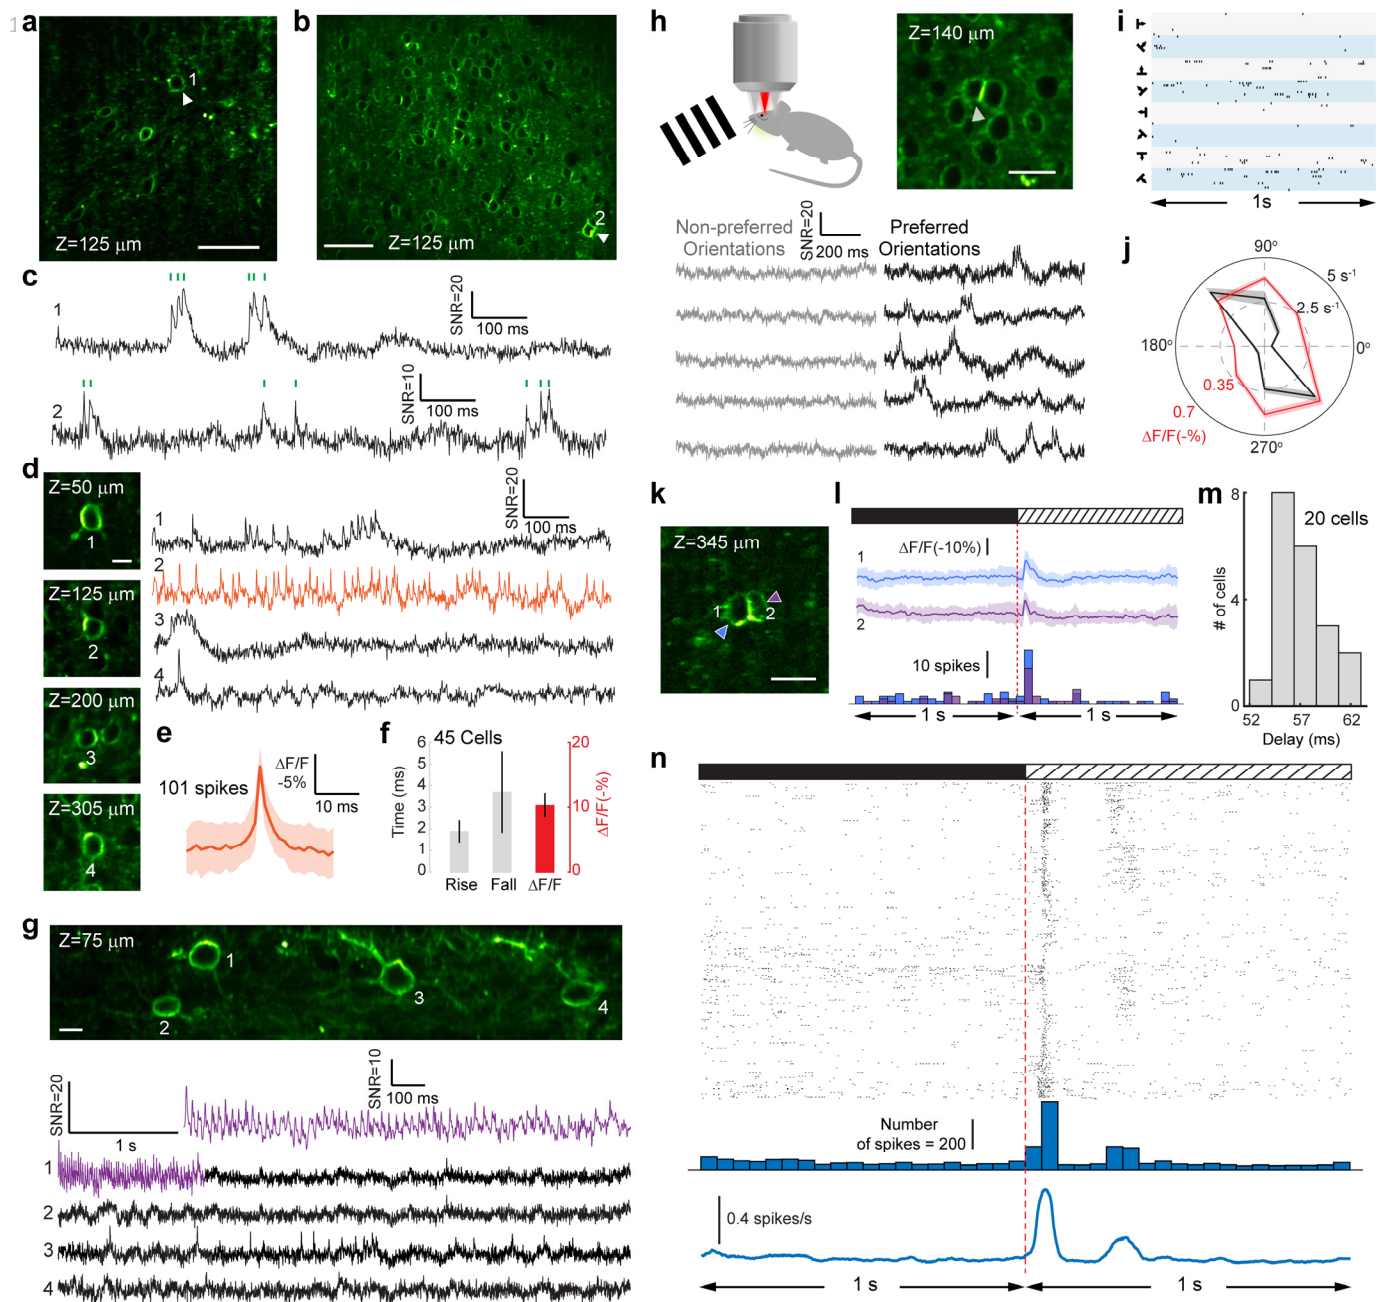

**Figure 3: 1 kHz imaging of supra- and sub-threshold voltage responses with genetically encoded voltage sensor ASAP3 in V1 of awake mice.**

(a,b) Representative images of neurons in V1 (a) sparsely or (b) densely labeled with soma-targeted ASAP3-Kv. (c) Spontaneous voltage traces (SNR,  $\Delta F/F$ ) from neurons 1 and 2 in (a) and (b), respectively; Green ticks: spikes. (d) Neurons at different depths of a cortical column and their spontaneous voltage traces. (e) Average of 101 spikes from neuron 2 (orange trace) in (d); (f) Rise time, fall time, and  $\Delta F/F$  of spikes (mean  $\pm$  s.d.,  $n=45$  cells from 3 mice). (g) 1kHz imaging over a  $50 \times 250 \mu\text{m}^2$  field of view with four neurons exhibiting distinct spontaneous activity patterns. (h) Voltage traces from a V1 neurons showing orientation selectivity, with more sub- and supra-threshold activity for preferred orientations (black traces) than for non-preferred orientations (gray traces). (i) Raster plot of spikes for all trials (10 trials for each of 8 grating stimuli) and (j) polar plot showing the orientation tuning of mean subthreshold  $\Delta F/F$  response (red) and spiking rate (black) of the neuron in (h). (k) Image of two neurons at  $345 \mu\text{m}$  depth and (l) their subthreshold  $\Delta F/F$  (upper traces, average of 52 trials) and spiking (lower histograms, 50-ms bins) responses relative to the onset of grating stimuli (red dashed line). (m) Histogram of the time to reach peak subthreshold voltage responses post stimulus onset from 20 cells in 3 mice. (n) Spiking response relative to stimulus onset. From top to bottom: raster plot, histogram (50-ms bins), and averaged firing rate (50-ms sliding rectangular windows) of 2747 detected spikes from 617 trials of 20 neurons in 3 mice. Shaded areas: s.d.; Scale bars: (a,b)  $50 \mu\text{m}$ ; (d,g)  $10 \mu\text{m}$ ; (h, k)  $20 \mu\text{m}$ .



114 Finally and most importantly, we imaged neurons expressing the GEVI ASAP3 [10] in V1  
115 of head-fixed awake mice. Among GEVIs, ASAP-family indicators are currently the only ones to  
116 have reported single spikes *in vivo* with 2PFM, albeit in a limited number of neurons in the context  
117 of random-access scanning [10, 11, 16]. ASAP3 reports membrane depolarizations and action  
118 potentials as downward deflections in fluorescence. Using the soma-targeted ASAP3-Kv in both  
119 sparsely labeled (**Fig. 3a**) and densely labeled preparations (**Fig. 3b**), we observed that  
120 fluorescence was largely concentrated to somata. Imaging these neurons at 1,000 fps  
121 continuously for six seconds, we observed substantial photobleaching (**Supplementary Fig. 7**).  
122 However, if 1-kHz imaging was carried out in 1-s bouts interleaved with 2.5-s dark periods, ASAP3  
123 fluorescence from individual neurons recovered almost completely between bouts  
124 (**Supplementary Fig. 8**), allowing us to interrogate voltage responses from the same neurons  
125 repeatedly. Here, we employed both 6-s continuous recordings and intermittent 1-s recordings for  
126 *in vivo* experiments.

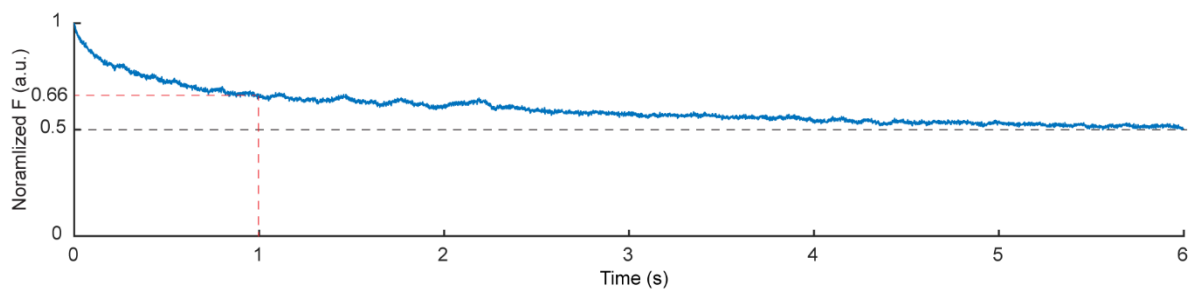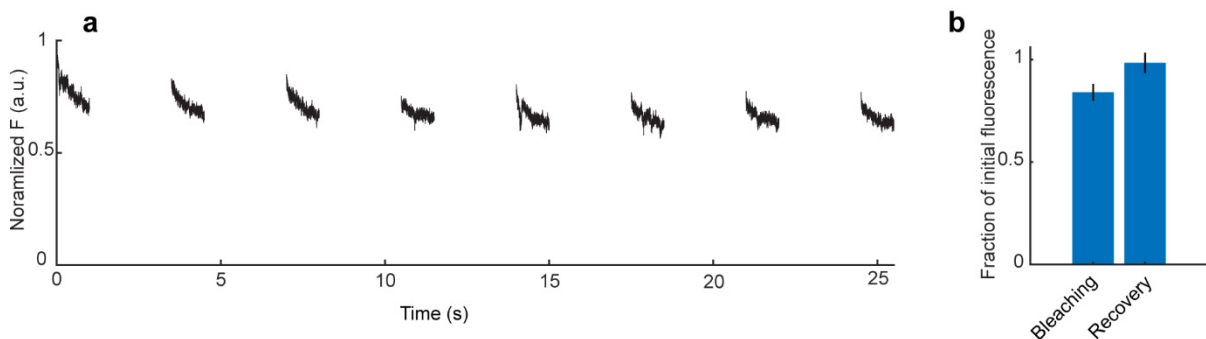

127 We extracted fluorescence from pixels representing cell membranes to obtain time-  
128 dependent traces for each neuron. Despite photobleaching, downward signals corresponding to  
129 putative individual action potentials (“optical spikes”) could be easily detected from raw traces in  
130 single trials (**Supplementary Fig. 9**). After correcting for photobleaching, we calculated the  
131 relative fluorescence change both in terms of signal-to-noise ratio (SNR,  $\Delta F/\sqrt{F}$ ) and  $\Delta F/F$   
132 (**Methods, Supplementary Fig. 9, Fig. 3**).

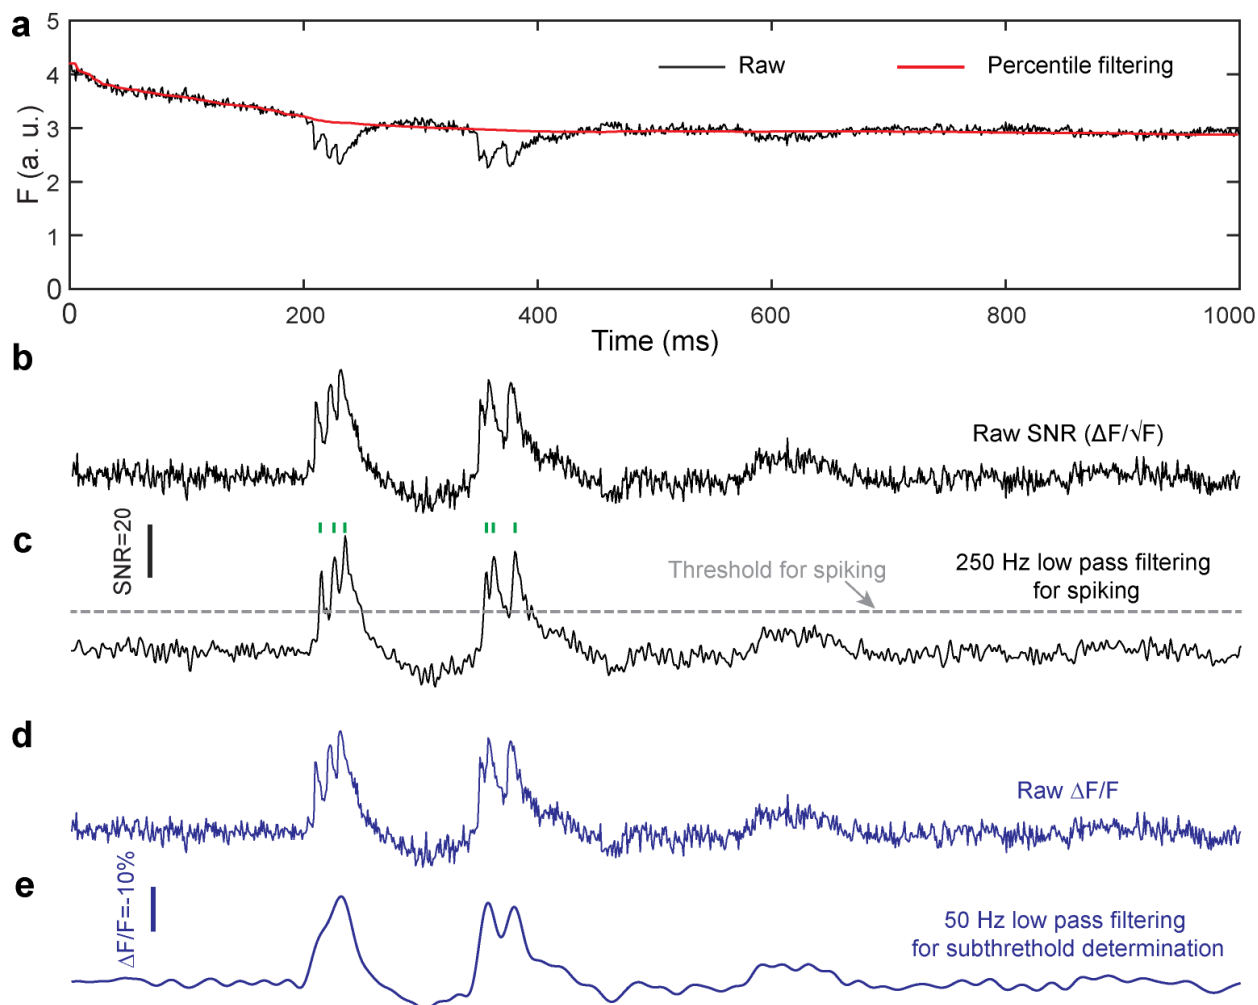

**Supplementary Figure 9: Data processing for *in vivo* voltage traces.** (a) Baseline fluorescence  $F$  (red) was obtained by low-pass filtering (500-ms rolling percentile (50%) filter) of the raw signal trace (black). (b) Raw SNR trace ( $\Delta F/\sqrt{F}$ , fluorescence change-to-noise ratio). (c) Smoothened SNR trace obtained by applying a 250-Hz low-pass Butterworth filter to (b). Optical spikes (green ticks) were identified as local SNR maxima above a spiking threshold (e.g., 7.5) at least 3 ms apart. (d) Raw  $\Delta F/F$ . (e) Smoothened trace representing the subthreshold response obtained by applying a 50-Hz low-pass Butterworth filter to (d). All traces in **Fig. 3** are raw traces as in (b) and (d).

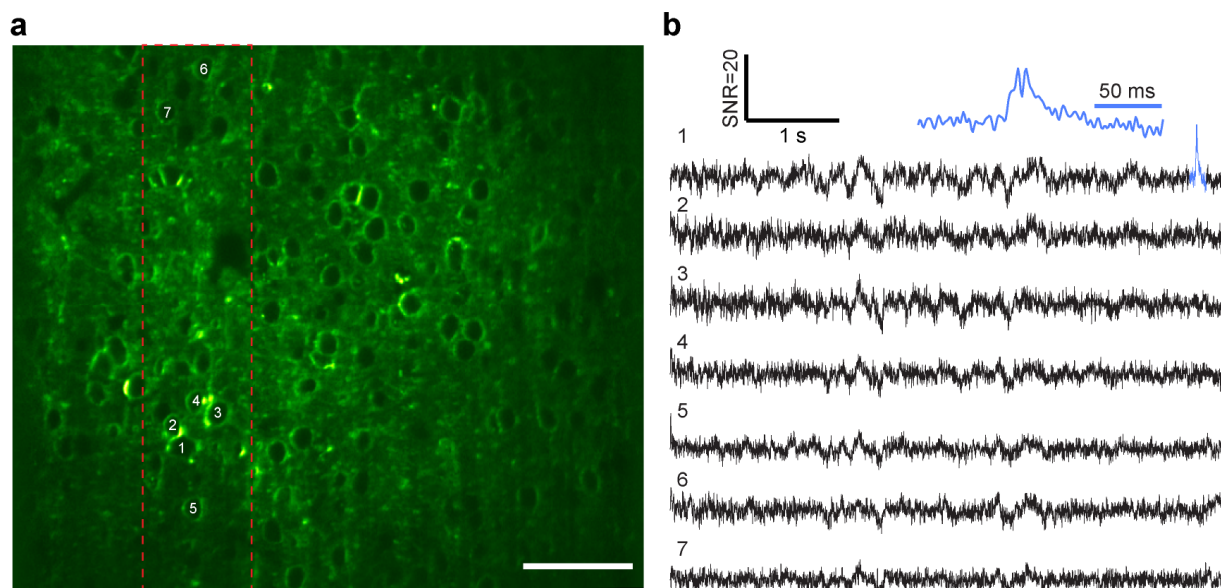

**Supplementary Figure 10: 1 kHz imaging of voltage responses in V1 of awake mice at a  $50 \times 250 \mu\text{m}^2$  FOV.** (a) Dashed red box indicates the FOV for 1 kHz FAGED imaging; within this FOV, 15 ASAP3-expressing cells were imaged simultaneously. (b) Voltage traces for the 7 cells labeled in (a). During a 6-s recording, a burst of two spikes were detected for ROI 1. Note the absence of these spikes in ROIs 2-5, which were in close proximity with ROI 1. Image depth: 155  $\mu\text{m}$ ; post-objective power: 75 mW. Scale bar: 50  $\mu\text{m}$ .

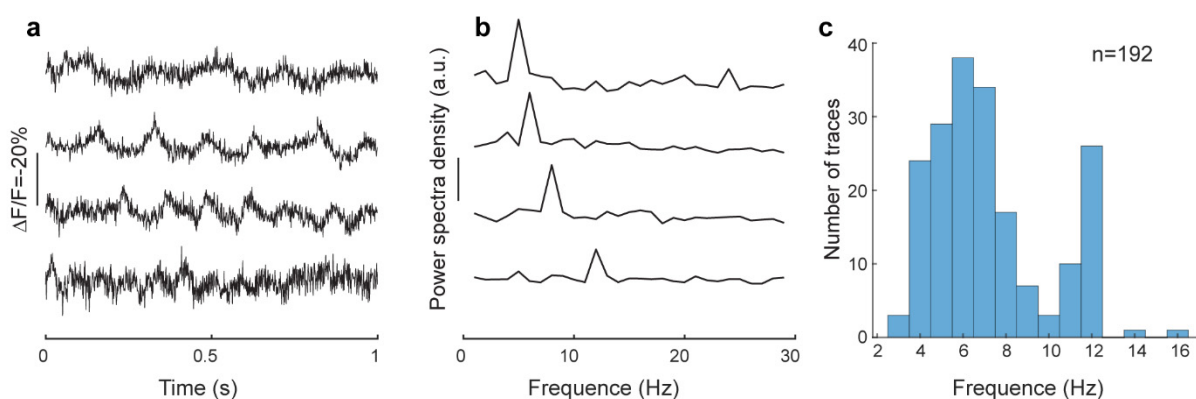

**Supplementary Figure 11: Imaging the subthreshold oscillations in V1 of awake mice.** (a) Representative raw  $\Delta F/F$  traces and (b) their corresponding power spectra from individual neurons. (c) Histogram of the peak oscillation frequencies (192 traces from 120 cells in three mice).

133 FAGED 2PFM enabled us to detect both suprathreshold and subthreshold membrane  
134 potential variations from neurons in both sparsely and densely labeled brains (**Fig. 3c**). The ability  
135 of 2PFM to provide high-resolution images in optically opaque brains enabled us to measure  
136 spontaneous voltage activity from neurons located at four different depths down to 305  $\mu\text{m}$  below  
137 the dura in the same awake mouse brain (**Fig. 3d**). In one of these neurons (orange trace, ROI2  
138 of **Fig. 3d**), we detected a total of 101 isolated spikes in 48 s of recording and obtained an

139 averaged spiking profile (**Fig. 3e**). From the averaged spike waveforms of this and other neurons,  
140 we determined the rise time, the decay time, and the  $\Delta F/F$  for single action potentials to be  $1.93$   
141  $\pm 0.51$  ms,  $3.73 \pm 1.88$  ms, and  $0.10 \pm 0.02$  (mean  $\pm$  s.d.,  $n = 45$  cells from three mice), respectively  
142 (**Fig. 3f**). These voltage response characteristics are consistent with those measured from ASAP3  
143 by random-access two-photon microscopy [10].

144 FACED 2PFM can image a large field of view (FOV) along the Y-axis without  
145 compromising imaging speed. In one example (**Fig. 3g**), we measured both spontaneous spiking  
146 and subthreshold activity from four neurons within a  $50 \times 250 \mu\text{m}^2$  FOV, and observed spike  
147 bursts lasting over 1 s in one neuron (purple trace, ROI1 of **Fig. 3g**). Because two-photon  
148 excitation is restricted to a femtoliter volume at the focal point and fluorescence photons  
149 generated at different locations are detected at different times, there was no cross-pixel  
150 contamination of voltage signals even in immediately neighboring neurons (for an example of  
151 densely labeled brains, see **Supplementary Fig. 10**). In many recording sessions, we observed  
152 rhythmic subthreshold oscillations in the voltage traces of individual neurons (**Supplementary**  
153 **Fig. 11**), with the dominant oscillation frequencies falling within 4-12 Hz, suggesting that they  
154 originated from cortical theta oscillations [17, 18].

155 FACED 2PFM also detected sensory evoked spiking and subthreshold responses of  
156 primary visual cortical (V1) neurons in awake mice presented with drifting grating visual stimuli of  
157 different orientations. For an orientation-selective neuron that was preferentially activated by  
158 gratings along specific orientations, we observed minimal voltage signal in response to non-  
159 preferred orientations but strong subthreshold as well as spiking activity in response to preferred  
160 orientations (**Fig. 3h**). From the spiking activity of all trials (ten 1-s trials for each of the eight  
161 gratings, **Fig. 3i**), we calculated the tuning curve of this neuron (black curve, **Fig. 3j**). Compared  
162 with the tuning curve calculated from subthreshold responses (red curve, **Fig. 3j**), the orientation  
163 tuning of spiking activity was sharper. Consistent with previous whole-cell recordings, these  
164 results suggest that spike thresholding sharpens selectivity for action potential output over  
165 subthreshold membrane potential [19, 20]. This same trend was observed in other orientation- as  
166 well as direction-selective neurons (**Supplementary Fig. 12**).

167 We also investigated how long it took for visual information to reach V1. In an example  
168 FOV, we found two visually responsive neurons at  $345 \mu\text{m}$  below dura (**Fig. 3k**). The subthreshold  
169 responses reached their peaks 60 ms and 57 ms after the stimulus onset (i.e., the switch from  
170 dark screen to grating stimuli) (**Fig. 3l**), respectively. On the population level, the peak

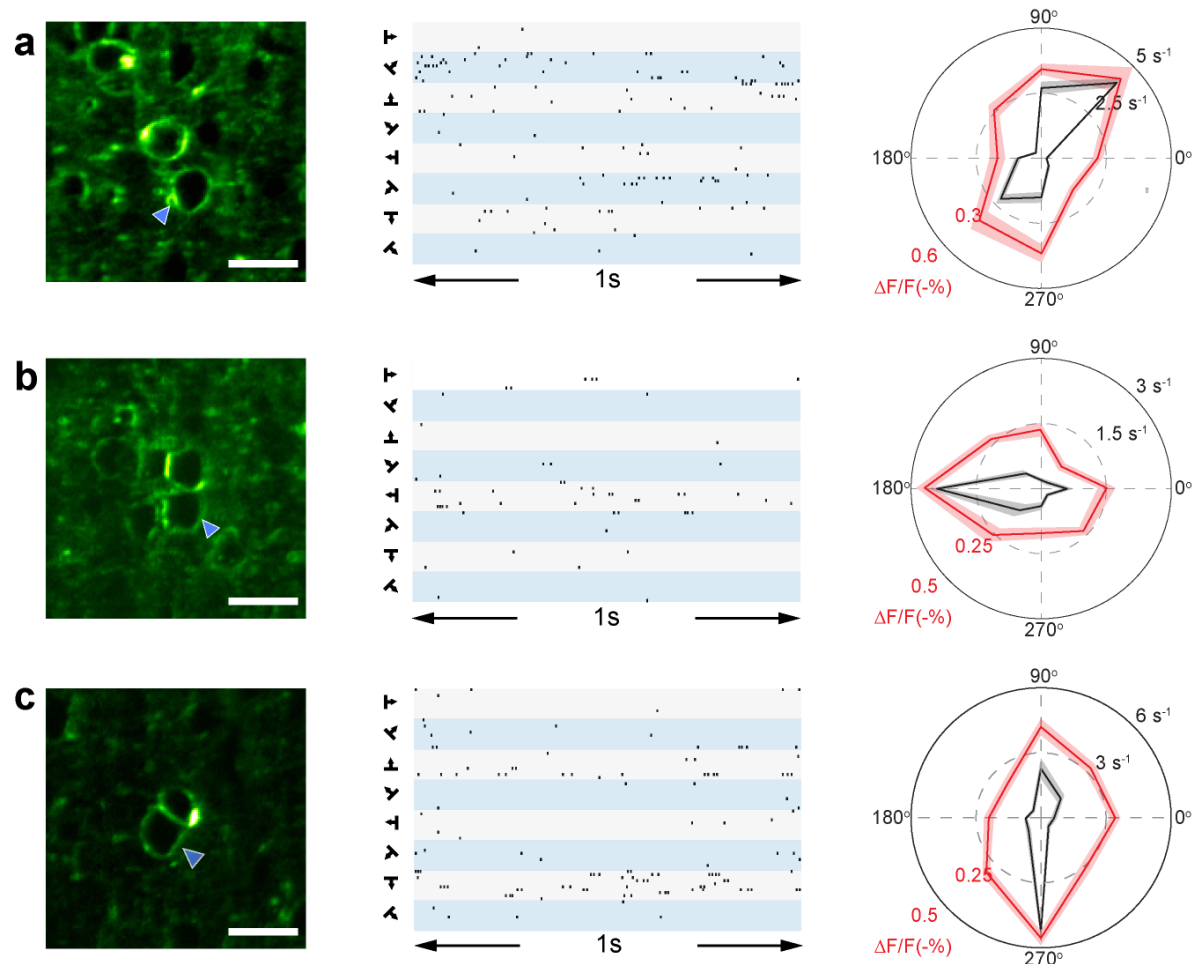

**Supplementary Figure 12: Orientation and direction tuning of neurons in V1 of awake mice.** Left panels: FACED 2PFM images of the neurons. Middle panels: Raster plots showing optical spikes detected from each neuron (blue arrowheads) during the presentation of grating stimuli (10 trials for each of the 8 stimuli). Right panels: Polar plots showing mean spike rate (black) and average subthreshold  $\Delta F/F$  (red) for (a) an orientation-selective and (b,c) two direction-selective neurons. Shaded areas: standard deviation. Image depth and post-objective power for a, b, c: 140, 170, 130  $\mu\text{m}$ ; 35, 30, 30 mW. Scale bar: 20  $\mu\text{m}$ .

171 subthreshold response had a latency of  $57.3 \pm 2.3$  ms (mean  $\pm$  s.d.,  $n = 20$  cells from 3 mice, **Fig.**  
 172 **3m**), whereas the spike rate reached its peak 60 ms after stimulus onset (**Fig. 3n**). These  
 173 latencies are consistent with the results measured with electrophysiological methods [21, 22].

174 In summary, using an all-optical passive laser scanner based on FACED, we achieved  
 175 kilohertz-rate full-frame 2PFM imaging of neural activity with subcellular resolution in the mouse  
 176 brain *in vivo*. FACED enabled electrical activity recordings of V1 neurons in awake mice, enabling  
 177 characterization of orientation tuning properties and onset times of both subthreshold and spiking  
 178 activity evoked by grating stimuli. The average laser power used in these experiments  
 179 (**Supplementary Table 1**), 10–85 mW post objective, remained within the safe range and

180 substantially below the threshold for heating-induced damages [23]. We did not observe signs of  
181 photodamages (e.g., blabbing of dendrites) in any of the samples tested, suggesting higher-order  
182 nonlinear photodamage processes to be also minimal. This is expected, because the power of  
183 individual beamlet post objective was  $\sim 0.1\text{--}1$  mW and overlaying tissue further reduced the actual  
184 focal energy as a result of scattering loss. Furthermore, subsequent excitation pulses arrived at  
185 the same sample positions after 1-ms delays, providing ample time for the fluorophores to return  
186 from their photodamage-prone dark states back to their ground electronic state, a process that  
187 was previously shown to reduce photobleaching and increase fluorophore brightness [24].

188 The frame rate of FACED 2PFM can be further increased by simply scanning the Y  
189 galvanometer at higher speeds. Using the 4-MHz 1,035-nm output of our laser system and  
190 scanning the Y galvanometer at 1,500 Hz, we imaged calcium activity *in vivo* at 3,000 fps with  $80$   
191  $\times 1200$  pixels per frame (**Supplementary Fig. 13, Supplementary Video 11**). New developments  
192 in laser systems (e.g., 4-MHz output at 920 nm, now commercially available) or voltage sensors  
193 (e.g., yellow or red variants that can be excited at 1,035 nm) should allow us to image voltage *in*  
194 *vivo* at 3,000 Hz as well, if desired. With the current pixel dwell time of 2 ns, FACED 2PFM reaches  
195 the limit on pixel rate imposed by the excited-state lifetime of high-quantum-yield fluorophores.  
196 Further reduction of the pixel dwell time would cause substantial cross-talk between neighboring  
197 pixels, resulting in a decrease in spatial resolution along the FACED axis. However, for activity  
198 imaging of spatially extended ROIs where signals from multiple pixels are averaged, minor cross-  
199 talk should not have a significant impact on activity measurement.

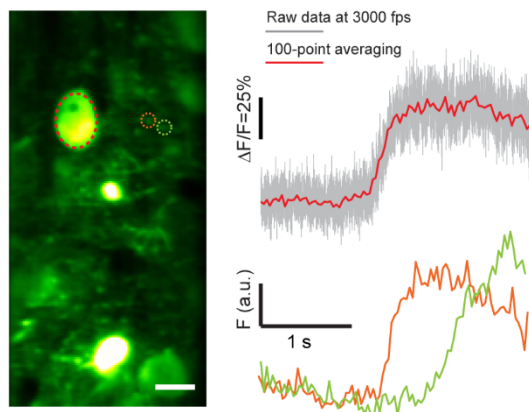

**Supplementary figure 13: 3 kHz neural activity imaging in**

**V1 of awake mouse *in vivo*.** (Left) Mean intensity projection

of 9,000 frames recorded in 3 s; (Right) Top panel: a

spontaneous calcium transient from the soma of a cell (red

dashed ROI); bottom panel: fluorescence traces within two

ROIs (orange and green ROIs) show calcium propagation

along a dendrite. Gray lines: raw data traces; colored lines:

100-point boxcar averaging of the raw traces. Indicator:

GCaMP6s; imaging depth: 125  $\mu\text{m}$ ; FOV:  $50 \times 100 \mu\text{m}^2$ ; post-

objective power: 90 mW; excitation wavelength: 1035 nm.

200 As we demonstrated here, by adding a passive FACED module to an existing 2PFM  
201 system, we transformed the microscope into an ultrafast imaging system with kHz frame rate. The  
202 FACED approach is thus readily compatible with conventional galvanometer-based 2PFMs,  
203 which favors its wide dissemination in optical brain imaging research. Following the conventional

204 raster scanning strategy (albeit at much higher speeds), FACED 2PFM requires minimal  
205 computational processing, works in both sparsely and densely labeled samples, and is immune  
206 to crosstalk effects or source localization ambiguities observed in computation-based high-speed  
207 imaging techniques [12, 25]. Sampling an entire image plane allows post hoc motion correction,  
208 therefore making FACED 2PFM more resistant to sample motion than random-access 2PFMs.  
209 With existing sensors, FACED 2PFM offers sufficient speed and sensitivity to detect calcium and  
210 glutamate transients from neuronal processes, as well as both spiking and subthreshold voltage  
211 events from cell bodies. Future improvement in brightness and sensitivity of voltage indicators  
212 should further enhance detection of voltage signals in subcellular compartments, which should  
213 allow FACED imaging to fulfill its full potential in interrogating electrical activity in the brain at  
214 synaptic resolution.

## 215 **METHODS**

### 216 **Animals**

217 All animal experiments were conducted according to the National Institutes of Health guidelines  
218 for animal research. Procedures and protocols on mice were approved by the Institutional Animal  
219 Care and Use Committee at Janelia Research Campus, Howard Hughes Medical Institute.

### 220 **FACED two-photon fluorescence microscope (2PFM)**

221 The simplified schematic of the FACED 2PFM is shown in **Supplementary Fig. 1a**. The two-  
222 photon excitation laser source at 920 nm (1 MHz repetition rate, 2 W maximal average output  
223 power, < 100 fs pulse width) was generated by an optical parametric amplifier (Opera-F, Coherent  
224 Inc.) that was pumped by a fiber laser at 1035 nm (Monaco 1035-40-40, 1 MHz or 4 MHz repetition  
225 rate, < 315 fs pulse width, 35 W, Coherent Inc.). After dispersion compensation [26], the laser  
226 beam was expanded with a 2× beam expander (BE02M-B, Thorlabs) to 8 mm in diameter. The  
227 beam then passed through a 4 to 5-mm wide slit and was one-dimensionally focused ( $\Delta\theta = 1^\circ$ ) by  
228 a cylindrical lens (LJ1267RM-B, Thorlabs, effective input NA 0.01) into a nearly parallel mirror  
229 pair ( $\alpha = 0.0125^\circ$ , reflectivity > 99.9% and GDD < 10 fs<sup>2</sup> per reflection at 920 nm, fused silica  
230 substrate, 250 mm long and 20 mm wide, Layertec GmbH) with a separation of 300 mm. Because  
231 of the misalignment angle  $\alpha$ , all the light rays eventually reflected back, following a set of zig-zig  
232 paths determined by their angles of incidence. After the FACED module, the rays (e.g. red rays  
233 in **Fig. 1a**) subjected to the same number of reflections by the mirror pair formed a single beamlet,  
234 and can be considered as emanating from a virtual light source located far away from the mirror

235 pair. In this work, the retroreflected light rays formed 80 beamlets, and had their propagation  
236 distances within the FACED module (or their distance from their respective virtual sources)  
237 monotonically increase from ~10 m to ~60 m. The power throughput of the FACED module was  
238 ~40%.

239 A polarization beam splitter (CCM1-PBS253, Thorlabs) in combination with a half-wave  
240 plate (AHWP05M-980, Thorlabs) and quarter-wave plate (AQWP05M-980, Thorlabs) were used  
241 to direct the spatially and temporally separated pulse trains into a 2PFM. A pair of achromatic  
242 doublets (AC508-500-B and AC508-250-B, Thorlabs) was used to conjugate the focal plan of the  
243 cylindrical lens and the midpoint of a pair of closely and orthogonally arranged X and Y galvo  
244 mirrors (6215H, Cambridge Technology). A scan lens / tube lens pair (SL50-2P2 and TTL200MP,  
245 Thorlabs) were used to conjugate the galvos to the back focal plane of a 25×/1.05 NA water-  
246 dipping objective lens (XLPLN25XWMP2, Olympus) that was mounted on a piezo stage (P-  
247 725K094, Physik Instrumente). The two-photon excited fluorescence signal was collected by the  
248 same microscope objective, reflected by a dichroic mirror (FF665-Di02-25×36, Semrock), focused  
249 by two lenses (AC508-080-A and LA1951-A Thorlabs), and after passing through an emission  
250 filter (FF01-680/SP, Semrock), detected by a photomultiplier tube without a current protection  
251 circuit (PMT, H7422P-40 MOD, Hamamatsu). The PMT signal was sampled at 625 MS/s with a  
252 high-speed digitizer (2G onboard memory, PXIe-5160, National Instruments) embedded in a  
253 chassis (PXIe-1071, National Instruments). From the chassis, the data was transferred to and  
254 saved by a desktop computer through a PCIe 16× interface.

255 By tuning the misalignment angle between the two mirrors ( $\alpha = 0.0125^\circ$ , see above), we  
256 generated a sequence of 80 focal spots extending 50  $\mu\text{m}$  along the X axis. With the separation  
257 between the two mirrors set at 300 mm, the time delay between adjacent pulses was 2 ns. With  
258 1 MHz repetition rate of the 920 nm output, the FACED module gave rise to a line scan rate of 1  
259 MHz. Using the Y galvo to scan the foci along the direction orthogonal to the X/FACED axis at  
260 500 Hz, and collecting the data bidirectionally, we achieved a frame rate of 1,000 fps with an  
261 effective image size of 80 × 900 pixels. 80 was given by the number of foci in the FACED axis  
262 and 900 was the product of the effective frame time (1 ms frame time minus a 100  $\mu\text{s}$  dead time  
263 during mirror turns) and line scan rate. To increase the number of pixels in the FACED/X axis, X  
264 galvo was stepped to tile FACED images and increase the field of view. With 4 MHz 1035 nm  
265 excitation, we scanned the Y galvo at 1,500 Hz and achieved a frame rate of 3,000 Hz with an  
266 effective image size of 80 × 1200 pixels. For morphological imaging, we scanned the Y galvo at



267 50 Hz, resulting in a FACED imaging frame rate of 100 fps. (**Supplementary Table 1** listed all  
 268 the major imaging parameters used in this work).

**Supplementary table 1:** Major parameters used for FACED imaging at 1 kHz

| Figure number | Indicator | FOV Y-axis ( $\mu\text{m}$ ) | Laser Power (mW) | Imaging Depth ( $\mu\text{m}$ ) |                |     |
|---------------|-----------|------------------------------|------------------|---------------------------------|----------------|-----|
| Fig.S4        | GCaMP6f   | 150                          | 40               | N/A                             | Brain slice    |     |
| Fig.2a        | A184V     | 150                          | 25               |                                 | Culture        |     |
| Fig.2a        | S72A      | 150                          | 30               |                                 |                |     |
| Fig.S3        | GCaMP6s   | 150                          | 20               |                                 |                |     |
| Fig.S5        |           | 50                           | 20               |                                 |                |     |
| Fig.2b        | A184V     | 150                          | 40               | 150-250                         | <i>In vivo</i> |     |
| Fig.S6        | S72A      | 150                          | 40               | 150-250                         |                |     |
| Fig.2b        |           | 50                           | 40               | 150-250                         |                |     |
| Fig.3a        |           | 50                           | 35               | 125                             |                |     |
| Fig.3b        |           | 50                           | 25               | 125                             |                |     |
| Fig.3d        |           | 50                           | 10               | 50                              |                |     |
| Fig.3d        |           | 50                           | 35               | 125                             |                |     |
| Fig.3d        |           | 250                          | 85               | 200                             |                |     |
| Fig.3d        |           | 50                           | 55               | 305                             |                |     |
| Fig.3g        |           | ASAP3                        | 250              | 35                              |                | 75  |
| Fig.3h        |           |                              | 50               | 35                              |                | 140 |
| Fig.3k        |           |                              | 50               | 40                              |                | 345 |
| Fig.S10       |           |                              | 250              | 75                              |                | 155 |
| Fig.S12a      |           |                              | 50               | 35                              |                | 140 |
| Fig.S12b      |           |                              | 50               | 30                              |                | 170 |
| Fig.S12c      |           |                              | 50               | 30                              |                | 130 |

269 The raw data from the digitizer was saved as 1D waveforms. The Gen-1 PCIe 16 $\times$  slot  
 270 on the data acquisition computer had a maximal streaming rate of 250 Mb/s, which caused the  
 271 data to overflow the on-chip memory of the digitizer after 6 s of data acquisition and thus limited  
 272 the data collection to up to 6-s bouts. Upgrading the computer with Gen-3 PCIe 16 $\times$  interface  
 273 should allow us to stream data continuously. At 1 kHz frame rate, each image frame had 625  $\times$   
 274 900 sampling points, with 100  $\times$  900 data points sampling actual fluorescence excitation by the  
 275 FACED foci and used to reconstruct a single image. If desired, multi-line scans were averaged  
 276 to generate a single X line in the final image: for a Y-axis range of 150  $\mu\text{m}$ , 3 line scans were  
 277 averaged to form a single row; for a Y-axis range of 50  $\mu\text{m}$ , 9 line scans are averaged. The final  
 278 images were motion-registered with an iterative cross-correlation-based registration algorithm  
 279 [27]. For morphological imaging, each FACED image frame had 625  $\times$  9000 sampling points (10 $\times$   
 280 exposure time), and a 10 $\times$  increase in line averaging to form the final image.

## 281 Analysis of activity data

282 We manually selected regions of interests (ROIs) from the averaged images of the registered  
283 image sequence. The mean fluorescent intensity within the ROIs was used to calculate the  $\Delta F/F$   
284 time traces, with  $F$  being the baseline fluorescence and  $\Delta F$  being the fluorescence change due to  
285 neural activity. In the calcium and glutamate indicator datasets, to calculate the  $\Delta F/F$ , we  
286 calculated the baseline fluorescence  $F$  by fitting the data points away from the transients (e.g. the  
287 first and last 1000 data points in **Fig. 2a**) with a single exponential function.

288 In the voltage indicator datasets, the ROI was selected to cover the cell membrane.  
289 Adjoining membrane segments between neighboring neurons were excluded from the ROI. A  
290 rolling percentile filter (50%, 500 ms window) was applied to the mean-intensity trace of the ROI  
291 to get the fluorescence baseline  $F$  (**Supplementary Fig. 9**) and rare periods with uncorrectable  
292 motion artifacts were discarded. In addition to  $\Delta F/F$  traces, we calculated SNR traces as the ratio  
293 between  $\Delta F$  (functional change) and  $\sqrt{F}$  (Poisson noise) [28]. For spike detection, the SNR traces  
294 were further subjected to a 250-Hz 12<sup>th</sup> order low-pass Butterworth filter. The threshold for spikes  
295 was initially set at SNR = 7.5 and was manually adjusted if needed. Spikes were identified as  
296 local maxima that were at least 3 ms apart. To calculate the subthreshold activity, raw  $\Delta F/F$  traces  
297 were low-pass filtered with a 50-Hz 12<sup>th</sup> order low-pass Butterworth filter and the mean  $\Delta F/F$  value  
298 during the entire duration of sensory stimulation (1-s of drifting grating) was used as the strength  
299 of subthreshold activity. To quantify the temporal dynamics of the optical voltage response, we  
300 aligned the optical spikes from the same neuron at peak response, and measured the rise (10%  
301 to 90%), decay (90% to 10%) and FWHM time from their averaged traces.

### 302 **Preparation and electric stimulation of primary neuronal culture**

303 Primary neuronal cultures from neonatal rat pups were prepared as described previously [29].  
304 AAV2/1.syn.GCaMP6s ( $1.8 \times 10^{13}$  GC/ml), AAV.DJ.syn.iGluSnFR.A184V ( $3 \times 10^{12}$  GC/ml), and  
305 AAV.DJ.syn.iGluSnFR.S72A ( $8.0 \times 10^{12}$  GC/ml) were used to label cultured neurons by adding 1  
306  $\mu$ l of viral solution to each well in 24 well plates with 300  $\mu$ l medium inside, respectively. After  
307 incubation overnight, 1 ml culture medium was added to each well. Neurons were imaged  
308 between 10 – 21 days post-transfection at room temperature in imaging buffer (145 mM NaCl,  
309 2.5 mM KCl, 10 mM glucose, 10 mM HEPES, 2 mM CaCl<sub>2</sub>, 1 mM MgCl<sub>2</sub>, pH7.4).

310 For electric stimulation, cultured neurons in imaging buffer were positioned between two  
311 parallel electrodes separated at  $\sim$ 10 mm. A stimulus isolator (NPIISO-01D100, ALA Scientific  
312 Instruments Inc.) and functional generator (AFG1022, Tektronix Inc.) was used to generate the

313 electric field. For each stimulation, a train of 10 pulses (pulse duration: 1 ms; period: 12 ms;  
314 voltage: 50 V) was used to drive the neurons.

### 315 **Preparation and electric stimulation of acute brain slices**

316 25-week-old male transgenic mice expressing GCaMP6f (scnn1a-TG3-cre x Ai93 x ACTB-tTA)  
317 [30, 31] were decapitated under deep isoflurane anesthesia, and the brain was transferred to an  
318 ice-cold dissection solution containing (in mM): 204.5 sucrose, 2.5 KCl, 1.25 NaH<sub>2</sub>PO<sub>4</sub>, 28  
319 NaHCO<sub>3</sub>, 7 dextrose, 3 Na-pyruvate, 1 Na-ascorbate, 0.5 CaCl<sub>2</sub>, 7 MgCl<sub>2</sub> (pH 7.4, oxygenated  
320 with 95% CO<sub>2</sub> and 5% O<sub>2</sub>). 350- $\mu$ m-thick coronal slices of the primary visual cortex (V1) were  
321 sectioned using a vibrating tissue slicer (Leica VT 1200S, Leica Microsystems, Wetzlar, Germany).  
322 The slices were then transferred to a suspended mesh within an incubation chamber filled with  
323 artificial cerebrospinal fluid (ACSF) containing (in mM): 125 NaCl, 2.5 KCl, 1.25 NaH<sub>2</sub>PO<sub>4</sub>, 25  
324 NaHCO<sub>3</sub>, 25 dextrose, 1.3 CaCl<sub>2</sub>, 1 MgCl<sub>2</sub> (pH 7.4, oxygenated with 95% CO<sub>2</sub> and 5% O<sub>2</sub>). After  
325 30 – 60 minutes of recovery at 35°C, the chamber was maintained at room temperature.

326 During imaging, slices were submerged in a recording chamber constantly perfused with  
327 oxygenated ACSF. A micropipette filled with ACSF were used for monopolar stimulation via a  
328 stimulus isolator (NPIISO-01D100, ALA Scientific Instruments Inc.) and a function generator  
329 (AFG1022, Tektronix Inc.). To provide extracellular stimulation, the stimulating electrode was  
330 placed in the proximity of the recorded cell, and a train of 10 pulses (pulse duration: 1 ms; period:  
331 12 ms; current: 300  $\mu$ A) was applied.

### 332 **Mouse preparation for *in vivo* imaging**

333 Mice (females or males, >2-months-old) were housed in cages (in groups of 1 – 5 before surgeries  
334 and in pairs or single housed after) under reverse light cycle. Wild-type (Jackson Laboratories,  
335 Black 6, stock #:000664) as well as Gad2-IRES-cre (Jackson Laboratories, Gad2tm2 (cre) Zjh/J,  
336 stock #: 010802) mice were used.

337 Virus injection and cranial window implantation procedures have been described  
338 previously [22]. Briefly, mice were anaesthetized with isoflurane (1 – 2% by volume in O<sub>2</sub>) and  
339 given the analgesic buprenorphine (SC, 0.3 mg per kg of body weight). Animals were head fixed  
340 in a stereotaxic apparatus (Model 1900, David Kopf Instruments). A 3.5-mm diameter craniotomy  
341 was made over the left V1 with dura left intact. A glass pipette (Drummond Scientific Company)  
342 beveled at 45° with a 15 – 20  $\mu$ m opening was back-filled with mineral oil. A fitted plunger  
343 controlled by a hydraulic manipulator (Narishige, MO10) was inserted into the pipette and used

344 to load and slowly inject 30 nl viral solution into the brain (~200 – 400  $\mu\text{m}$  below pia). 3 – 6 injection  
345 sites were chosen in the left V1 with 0.3 to 0.5 mm space between injection sites. The following  
346 viral vectors were used to label neurons with different sensors. Labeling with calcium sensor:  
347 AAV2/1.syn.GCaMP6s ( $1.8 \times 10^{13}$  GC/ml); Dense labeling with glutamate sensors:  
348 AAV.DJ.syn.iGluSnFR.A184V ( $3 \times 10^{12}$  GC/ml); AAV.DJ.syn.iGluSnFR.S72A ( $8.0 \times 10^{12}$  GC/ml);  
349 Sparse labeling with glutamate sensors: AAV.DJ.syn.FLEX.iGluSnFR.A184V ( $2.8 \times 10^{13}$  GC/ml)  
350 1:1 mixed with AAV2/1.syn.Cre (500 times diluted from  $1.5 \times 10^{13}$  GC/ml);  
351 AAV.DJ.syn.FLEX.iGluSnFR.S72A ( $5.2 \times 10^{12}$  GC/ml) 1:1 mixed with AAV2/1.syn.Cre (500 times  
352 diluted from  $1.5 \times 10^{13}$  GC/ml); labeling with the voltage sensor: AAV2/9.syn.ASAP3-Kv ( $1.55 \times$   
353  $10^{12}$  GC/ml). At the completion of viral injections, a glass window made of a single coverslip  
354 (Fisher Scientific No. 1.5) was embedded in the craniotomy and sealed in place with dental acrylic.  
355 A titanium head-post was then attached to the skull with cyanoacrylate glue and dental acrylic. *In*  
356 *vivo* imaging was carried out after at least two weeks of recovery with single or paired housing  
357 and habituation for head fixation. All imaging experiments were carried out on head-fixed awake  
358 mice.

### 359 **Visual stimulation in head-fixed awake mice**

360 Visual stimuli were presented by a liquid crystal display (22-inch diagonal and  $1920 \times 1080$  pixels).  
361 The screen was positioned at 15 cm from the eye of the mice and orientated at  $\sim 40^\circ$  to the long  
362 axis of the mice. Drifting sinusoidal gratings were presented for 1.5 s at 8 orientations ( $0^\circ$  to  $315^\circ$   
363 at  $45^\circ$  steps) in pseudorandom sequences. Between the grating stimulus, 6s dark screen were  
364 presented. Gratings had 100% contrast and 0.06 cycle per degree and drifted at 2 Hz. During  
365 each 1.5 s stimulation period, a sequence of 1,000 images were recorded from 0 s to 1 s; during  
366 each 6 s dark adaptation period, a sequence of 1,000 images were recorded from 2.5 s to 3.5 s.  
367 A total of 5 or 10 trials were repeated for each stimulus.

### 368 **Data processing**

369 Unless stated otherwise, all images and data presented here were unprocessed raw images/data,  
370 without smoothing, denoising, or deconvolution. **Supplementary Videos 1-10** were collected at  
371 1,000 fps but were binned every 20 or 50 frames (no binning in **Supplementary Video 10**) and  
372 saved at 20 binned fps for video output by Fiji [32], which was not capable of saving videos at  
373 1,000 fps. **Supplementary Video 11** were collected at 3,000 fps but were binned every 60 frames  
374 and saved at 20 binned fps for video output. “Green hot” lookup table in ImageJ was used for all  
375 images.

## 376 **ACKNOWLEDGEMENTS**

377 The authors thank Cristina Rodriguez for help with the laser system; Rongwen Lu for help with  
378 visual stimulation experiments; Guan Cao for providing cultured neuron samples; Jonathan  
379 Marvin, Loren Looger for providing glutamate sensors; and the Janelia JET team for designing  
380 and assembling the dispersion compensation unit. This work was supported by Howard Hughes  
381 Medical Institute (J.W., Y.L., C.-L.H., N.J.), and American Epilepsy Society predoctoral fellowship  
382 (M.C.); the China Scholarship Council Joint PhD Training Program (D.S.); Stanford Neuroscience  
383 PhD Program training grant 5T32MH020016 and the Post-9/11 GI Bill (S.W.E.); Research Grants  
384 Council of the Hong Kong Special Administrative Region of China (17209017, 17259316,  
385 17207715) (J.W., K.K.T.); and NIH BRAIN Initiative grants 1U01NS103464 (M.Z.L.),  
386 1RF1MH114105 (M.Z.L.), and 1UF1NS107696 (J.W., N.J., K.K.T.).

## 387 **CONTRIBUTIONS**

388 NJ conceived of the project; ML, KKT, and NJ supervised research; JW, KKT, and NJ designed  
389 FACED module; YL, SC, CLH prepared samples; MC created ASAP3; MC, SE, and DS  
390 characterized ASAP3 and ASAP3-expressing viruses; JW collected and analyzed the data; JW  
391 and NJ wrote the manuscript with inputs from all authors.

## 392 **CONFLICT OF INTERESTS**

393 The authors declare the following competing interests: KKT and The University of Hong Kong  
394 have filed a U.S. patent application (14/733,454) that relates to the all-optical laser-scanning  
395 imaging methods.

## 396 **SUPPLEMENTARY VIDEO INFORMATION**

397 **Supplementary video 1: Imaging calcium transients at 1,000 fps in GCaMP6s-expressing**  
398 **cultured neurons evoked by extracellular electric stimulation.** Same data as in Supp. Fig. 3.  
399 The raw image sequence was binned every 50 frames, saved at 20 binned fps, and compressed  
400 for video output.

401 **Supplementary video 2: Imaging calcium transients at 1,000 fps in GCaMP6f-expressing**  
402 **neurons in acute mouse brain slices evoked by extracellular electric stimulation.** Same  
403 data as in Supp. Fig. 4. The raw image sequence was binned every 50 frames, saved at 20 binned  
404 fps, and compressed for video output.

405 **Supplementary video 3: Imaging spontaneous calcium release events at 1,000 fps in**  
406 **neurites of GCaMP6s-expressing cultured neurons.** Same data as in Supp. Fig. 5. The raw  
407 image sequence was binned every 20 frames, saved at 20 binned fps, and compressed for video  
408 output.

409 **Supplementary videos 4-5: Imaging glutamate transients at 1,000 fps in cultured neurons**  
410 **expressing A184V variant of iGluSnFR evoked by extracellular electric stimulation.** Same  
411 A184V data as in Fig. 2a. The raw image sequence was binned every 50 frames, saved at 20  
412 binned fps, and compressed for video output.

413 **Supplementary videos 6-7: Imaging glutamate transients at 1,000 fps in cultured neurons**  
414 **expressing S72A variant of iGluSnFR evoked by extracellular electric stimulation.** Same  
415 S72A data as in Fig. 2a. The raw image sequence was binned every 50 frames, saved at 20  
416 binned fps, and compressed for video output.

417 **Supplementary video 8: Imaging glutamate transients of layer 2/3 neurons expressing**  
418 **A184V variant of iGluSnFR in V1 of awake mice at 1,000 fps.** The white arrow points to the  
419 glutamate releasing site. Same A184V data as in Fig. 2b. The raw image sequence was binned  
420 every 20 frames, saved at 20 binned fps, and compressed for video output.

421 **Supplementary video 9: Imaging glutamate transients of layer 2/3 neurons expressing**  
422 **S72A variant of iGluSnFR in V1 of awake mice at 1,000 fps.** The white arrow points to the  
423 glutamate releasing site. Same S72A data as in Fig. 2b. The raw image sequence was binned  
424 every 20 frames, saved at 20 binned fps, and compressed for video output.

425 **Supplementary video 10: Imaging rapid movement of a fluorescent particle at 1,000 fps in**  
426 **the layer 2/3 of awake mouse brain *in vivo*.** Same data as in Supp. Fig. 6. A sequence of 50  
427 raw images recorded at 1,000 fps was saved at 20 fps and compressed for video output.

428 **Supplementary video 11: Imaging spontaneous calcium transients of layer 2/3 neurons**  
429 **expressing GCaMP6s in V1 of awake mice at 3,000 fps.** Same data as in Supp. Fig. 14. The  
430 raw image sequence was binned every 60 frames, saved at 20 binned fps, and compressed for  
431 video output.

432

433 **REFERENCES:**

- 434 1. Lin M.Z. & Schnitzer M.J. Genetically encoded indicators of neuronal activity. *Nat.*  
435 *Neurosci.* **19**, 1142–1153 (2016). DOI: <https://doi.org/10.1038/nn.4359>
- 436 2. Chen, T., et al. Ultrasensitive fluorescent proteins for imaging neuronal activity. *Nature* **499**,  
437 295–300 (2013). DOI: <https://doi.org/10.1038/nature12354>
- 438 3. Marvin J.S., et al. An optimized fluorescent probe for visualizing glutamate neurotransmission.  
439 *Nature Methods* **10**, 162–170 (2013). DOI: <https://doi.org/10.1038/nmeth.2333>
- 440 4. Helmchen F. & Denk W. Deep tissue two-photon microscopy. *Nat. Methods* **2**, 932–940  
441 (2005). DOI: <https://doi.org/10.1038/nmeth818>
- 442 5. Ji, N., Freeman, J. & Smith, S.L. Technologies for imaging neural activity in large volumes.  
443 *Nat. Neurosci.* **19**, 1154–1164 (2016). DOI: <https://doi.org/10.1038/nn.4358>
- 444 6. Yang, W. & Yuste, R. *In vivo* imaging of neural activity. *Nat. Methods* **14**, 349–359 (2017).  
445 DOI: <https://doi.org/10.1038/nmeth.4230>
- 446 7. Cao, G., et al. Genetically targeted optical electrophysiology in intact neural circuits.  
447 *Cell* **154**, 904–913 (2013). DOI: <https://doi.org/10.1016/j.cell.2013.07.027>
- 448 8. Gong, Y., et al. High-speed recording of neural spikes in awake mice and flies with a  
449 fluorescent voltage sensor. *Science* **350**, 1361–1366 (2015).  
450 DOI: <https://doi.org/10.1126/science.aab0810>
- 451 9. Adam Y., et al. Voltage imaging and optogenetics reveal behaviour-dependent changes in  
452 hippocampal dynamics. *Nature* **569**, 413–417 (2019).  
453 DOI: <https://doi.org/10.1038/s41586-019-1166-7>
- 454 10. Chavarha, M., et al. Fast two-photon volumetric imaging of an improved voltage indicator  
455 reveals electrical activity in deeply located neurons in the awake brain. Preprint at  
456 <https://www.biorxiv.org/content/early/2018/10/17/445064> (2018).
- 457 11. Chamberland, S., et al. Fast two-photon imaging of subcellular voltage dynamics in neuronal  
458 tissue with genetically encoded indicators. *eLife* **6**, e25690 (2017).  
459 DOI: <https://doi.org/10.7554/eLife.25690>
- 460 12. Kazemipour, A., et al. KiloHertz frame-rate two-photon tomography. *Nat. Methods* **16**, 778–  
461 786 (2019). DOI: <https://doi.org/10.1038/s41592-019-0493-9>
- 462 13. Chan, A.C.S., et al. Speed-dependent resolution analysis of ultrafast laser-scanning  
463 fluorescence microscopy. *J. Opt. Soc. Am. B* **31**, 755–764 (2014).  
464 DOI: <https://doi.org/10.1364/JOSAB.31.000755>
- 465 14. Wu, J.L., et al. Ultrafast laser-scanning time-stretch imaging at visible wavelengths. *Light Sci.*  
466 *Appl.* **6**, e16196 (2016). DOI: <https://doi.org/10.1038/lsa.2016.196>

- 467 15. Marvin, J.S., et al. Stability, affinity and chromatic variants of the glutamate sensor iGluSnFR.  
468 Nat. Methods **15**, 936–939 (2018). DOI: <https://doi.org/10.1038/s41592-018-0171-3>
- 469 16. Yang, H. H., et al. Subcellular imaging of voltage and calcium signals reveals neural  
470 processing *in vivo*. Cell **166**, 245–257 (2016).  
471 DOI: <https://doi.org/10.1016/j.cell.2016.05.031>
- 472 17. Buzsáki, G. Theta oscillations in the hippocampus. Neuron **33**, 325–340 (2002).  
473 DOI: [https://doi.org/10.1016/S0896-6273\(02\)00586-X](https://doi.org/10.1016/S0896-6273(02)00586-X)
- 474 18. Alonso, A. & R. R. Llinás. Subthreshold Na<sup>+</sup>-dependent theta-like rhythmicity in stellate cells  
475 of entorhinal cortex layer II. Nature **342**, 175-177 (1989).  
476 DOI: <https://doi.org/10.1038/342175a0>
- 477 19. Tan, A. et al. Orientation Selectivity of Synaptic Input to Neurons in Mouse and Cat Primary  
478 Visual Cortex, J. Neurosci. **31**, 12339–12350 (2011).  
479 DOI: <https://doi.org/10.1523/JNEUROSCI.2039-11.2011>
- 480 20. Li Y. T. et al. Synaptic Basis for Differential Orientation Selectivity between Complex and  
481 Simple Cells in Mouse Visual Cortex. J. Neurosci. **35**, 11081-11093 (2015).  
482 DOI: <https://doi.org/10.1523/JNEUROSCI.5246-14.2015>
- 483 21. Resulaj, A., Ruediger, S., Olsen, S.R. & Scanziani, M. First spikes in visual cortex enable  
484 perceptual discrimination. eLife **7**, e34044 (2018).  
485 DOI: <https://doi.org/10.7554/eLife.34044>
- 486 22. Ma, W. p., et al. Visual representations by cortical somatostatin inhibitory neurons—selective  
487 but with weak and delayed responses. J. Neurosci. **30**, 14371–14379 (2010).  
488 DOI: <https://doi.org/10.1523/JNEUROSCI.3248-10.2010>
- 489 23. Podgorski, K. & Ranganathan, G. Brain heating induced by near-infrared lasers during  
490 multiphoton microscopy. J. Neurophysiol. **116**, 1012–1023 (2016).  
491 DOI: <https://doi.org/10.1152/jn.00275.2016>
- 492 24. Donnert, G., Eggeling, C. & Hell, S. W. Major signal increase in fluorescence microscopy  
493 through dark-state relaxation. Nat. Methods **4**, 81–86 (2007).  
494 DOI: <https://doi.org/10.1038/nmeth986>
- 495 25. Tsyboulski, D., Orlova, N., Ledochowitsch, P. & Saggau, P. Two-photon frequency division  
496 multiplexing for functional *in vivo* imaging: a feasibility study. Optics Express **27**, 4488-4503  
497 (2019). DOI: <https://doi.org/10.1364/OE.27.004488>
- 498 26. Chauhan, V., Bowlan, P., Cohen, J. & Trebino R. Single-diffraction-grating and prism pulse  
499 compressors. App. Optics **4**, 619–624 (2010).



- 500 DOI: <https://doi.org/10.1364/JOSAB.27.000619>
- 501 27. Lu, R., et al. Video-rate volumetric functional imaging of the brain at synaptic resolution. *Nat.*
- 502 *Neurosci.* **20**, 620–628 (2017). DOI: <https://doi.org/10.1038/nn.4516>
- 503 28. Wilt, B.A., Fitzgerald, J.E. & Schnitzer, M. J. Photon shot noise limits on optical detection
- 504 of neuronal spikes and estimation of spike timing. *Biophys. J.* **104**, 51–62 (2013). DOI:
- 505 <https://doi.org/10.1016/j.bpj.2012.07.058>
- 506 29. Wardill, T.J., *et al.* A neuron-based screening platform for optimizing genetically-encoded
- 507 calcium indicators. *PLoS One* **8**, e77728 (2013).
- 508 DOI: <https://doi.org/10.1371/journal.pone.0077728>
- 509 30. Madisen, L., *et al.* Transgenic mice for intersectional targeting of neural sensors and effectors
- 510 with high specificity and performance. *Neuron* **85**, 942–958 (2015).
- 511 DOI: <https://doi.org/10.1016/j.neuron.2015.02.022>
- 512 31. Madisen, L., *et al.* A robust and high-throughput Cre reporting and characterization system for
- 513 the whole mouse brain. *Nat. Neurosci.* **13**, 133–140 (2010).
- 514 DOI: <https://doi.org/10.1038/nn.2467>
- 515 32. Schindelin, J., et al. Fiji: an open-source platform for biological-image analysis. *Nat.*
- 516 *Methods* **9**, 676–682 (2012). DOI: <https://doi.org/10.1038/nmeth.2019>
